# Supplementary material for: Delta Neutrophil Index as a Prognostic Marker of Early Mortality in Gram Negative Bacteremia
Source: PubMed Central journal article supplement — Infect Chemother. 2014 Jun 20;46(2):94–102. doi: 10.3947/ic.2014.46.2.94 (PMC4091368; doi:10.3947/ic.2014.46.2.94), 2014-06-20
Supplement: ic-46-94-s001.pdf [file ic-46-94-s001.pdf]

**Supplementary Table 1.** Four models of multivariate analysis of factors associated with early mortality in gram negative bacteremia by logistic regression

| Variables                                                | Model 1                          | Model 2                              | Model 3                              | Model 4                                |
|----------------------------------------------------------|----------------------------------|--------------------------------------|--------------------------------------|----------------------------------------|
|                                                          | Adjusted odds ratio (95% CI)     | Adjusted odds ratio (95% CI)         | Adjusted odds ratio (95% CI)         | Adjusted odds ratio (95% CI)           |
| Age (years)                                              | 1.052 (0.979-1.131)              | 1.087 (0.978-1.209)                  | 1.097 (0.983-1.224)                  | 1.096 (0.979-1.226)                    |
| Gender                                                   |                                  |                                      |                                      |                                        |
| Male                                                     | 1.000                            | 1.000                                | 1.000                                | 1.000                                  |
| Female                                                   | 0.517 (0.100-2.671)              | 0.184 (0.012-2.747)                  | 0.219 (0.015-3.151)                  | 0.915 (0.061-13.802)                   |
| BMI (kg/m <sup>2</sup> )                                 | 1.015 (0.840-1.228)              | 0.907 (0.645-1.276)                  | 0.895 (0.638-1.256)                  | 1.158 (0.851-1.577)                    |
| Charlson index                                           | 1.393 (0.969-2.004)              | 1.166 (0.675-2.014)                  | 1.239 (0.693-2.213)                  | 1.618 (0.813-3.218)                    |
| Admission duration before the onset of bacteremia (days) | 0.999 (0.936-2.004)              | 1.008 (0.928-1.095)                  | 1.005 (0.913-1.106)                  | 0.978 (0.890-1.074)                    |
| History of ICU stay before the onset of bacteremia       |                                  |                                      |                                      |                                        |
| Yes                                                      | 8.185 (0.178-76.135)             | 9.587 (0.079-1164.857)               | 9.377 (0.056-1578.762)               | 77.370 (0.193-31089.796)               |
| No                                                       | 1.000                            | 1.000                                | 1.000                                | 1.000                                  |
| Health care associated infection                         |                                  |                                      |                                      |                                        |
| Yes                                                      | 2.168 (0.370-12.696)             | 4.358 (0.255-74.628)                 | 3.417 (0.194-60.094)                 | 4.179 (0.275-63.585)                   |
| No                                                       | 1.000                            | 1.000                                | 1.000                                | 1.000                                  |
| MDR bacterial infection                                  |                                  |                                      |                                      |                                        |
| Yes                                                      | 2.300 (0.377-14.015)             | 3.126 (0.232-42.187)                 | 3.014 (0.218-41.608)                 | 0.535 (0.031-9.280)                    |
| No                                                       | 1.000                            | 1.000                                | 1.000                                | 1.000                                  |
| SOFA score                                               | 1.637 (1.227-2.184) <sup>a</sup> | 2.236 (1.241-4.029) <sup>c</sup>     | 2.161 (1.239-3.770) <sup>f</sup>     | 2.244 (1.312-3.837) <sup>i</sup>       |
| Platelet count – day 1 (10 <sup>3</sup> /uL)             | 0.997 (0.988-1.005)              | 1.000 (0.987-1.013)                  |                                      |                                        |
| Platelet count – day 3 (10 <sup>3</sup> /uL)             |                                  |                                      | 0.994 (0.976-1.011)                  | 0.998 (0.981-1.016)                    |
| DN – day 1 (%)                                           | 1.074 (1.005-1.148) <sup>b</sup> | 1.163 (1.021-1.325) <sup>d</sup>     | 1.158 (1.016-1.319) <sup>g</sup>     |                                        |
| DN group                                                 |                                  |                                      |                                      |                                        |
| DN 1 < 7.6%                                              |                                  |                                      |                                      | 1.000                                  |
| DN 1 ≥ 7.6%                                              |                                  |                                      |                                      | 305.181 (1.725-53983.520) <sup>j</sup> |
| Trend of DN                                              |                                  |                                      |                                      |                                        |
| Day 1 > day 3                                            |                                  | 1.000                                | 1.000                                | 1.000                                  |
| Day 3 ≥ day 1                                            |                                  | 74.241 (1.626-3389.881) <sup>e</sup> | 58.786 (1.297-2664.400) <sup>h</sup> | 77.774 (1.897-3188.046) <sup>k</sup>   |
| AUC                                                      | 0.949                            | 0.980                                | 0.983                                | 0.987                                  |

BMI, body mass index; ICU, intensive care unit; MDR, multidrug resistant; SOFA, sequential organ failure assessment; DN, delta neutrophil index; CI, confidence interval; AUC, area under curve. <sup>a</sup>P-value=0.001. <sup>b</sup>P-value=0.036. <sup>c</sup>P-value=0.007. <sup>d</sup>P-value=0.027. <sup>e</sup>P-value=0.027. <sup>f</sup>P-value=0.028. <sup>g</sup>P-value=0.036. <sup>h</sup>P-value=0.003. <sup>i</sup>P-value=0.030. <sup>j</sup>P-value=0.022.
